# Supplementary material for: Solid-state reaction synthesis of two-dimensional CuGaSe2nanosheets for high performance photodetectors
Source: Royal Society of Chemistry journal article supplement (doi:10.1039/c4cp02736a), 2014-07-31
Supplement: c4cp02736a1.pdf [file c4cp02736a1.pdf]

## Supporting information

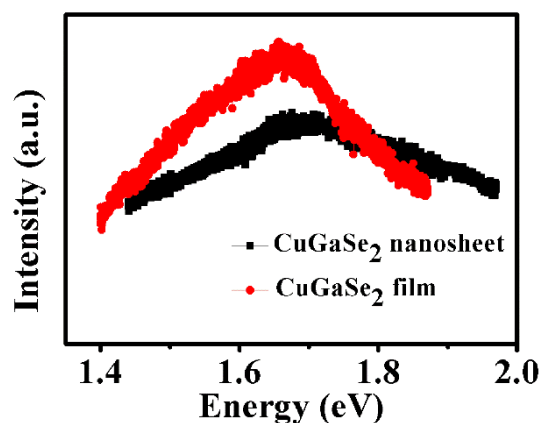

Figure S1. The PL spectrums of CuGaSe<sub>2</sub> nanosheets (16 nm) and films.

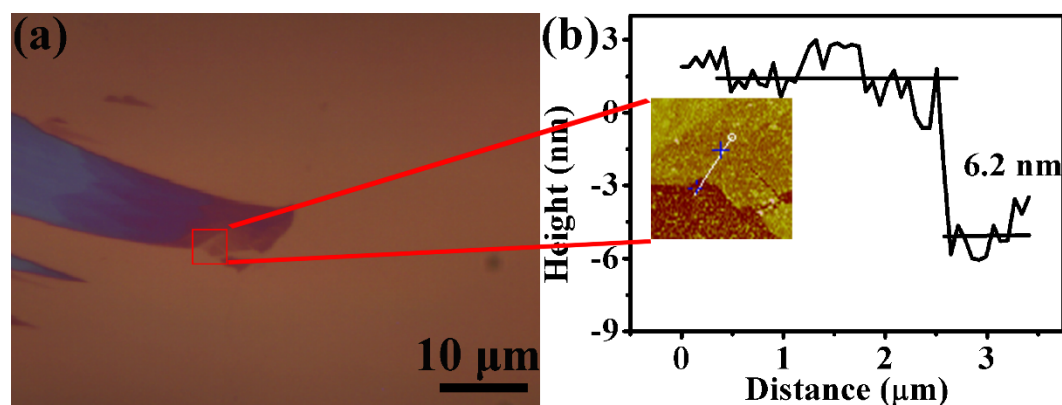

Figure S2. (a) A typical optical image of thinner CuGaSe<sub>2</sub> nanosheets. (b) Corresponding height profile for red square region in (a); Inset is corresponding AFM image.

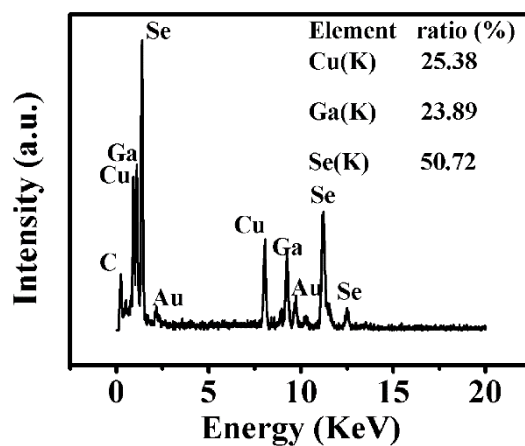

Figure S3. The EDS spectra of 2D CuGaSe<sub>2</sub> nanosheets.

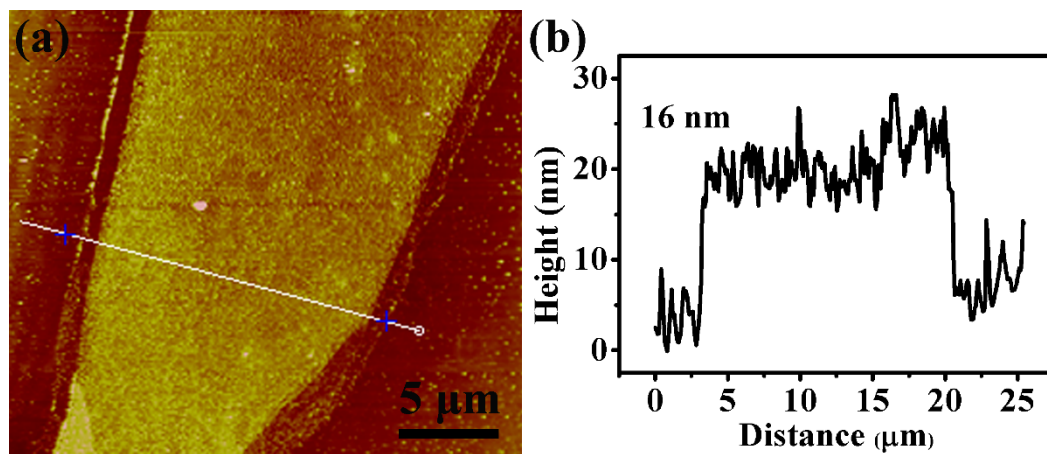

Figure S4. (a) AFM image of 2D CuGaSe<sub>2</sub> FETs; (b) Corresponding high profile of FETs.

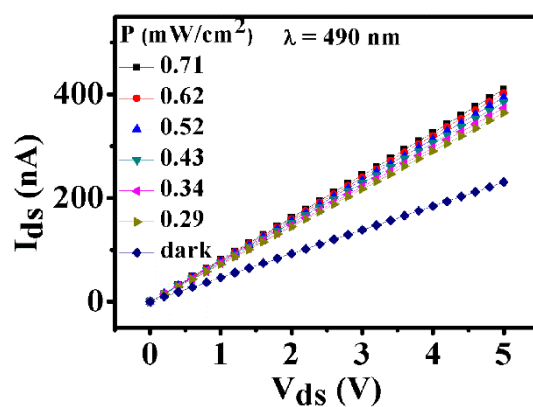

Figure S5. Output characteristics of the photodetector under illumination wavelength of 490 nm with various light intensities.

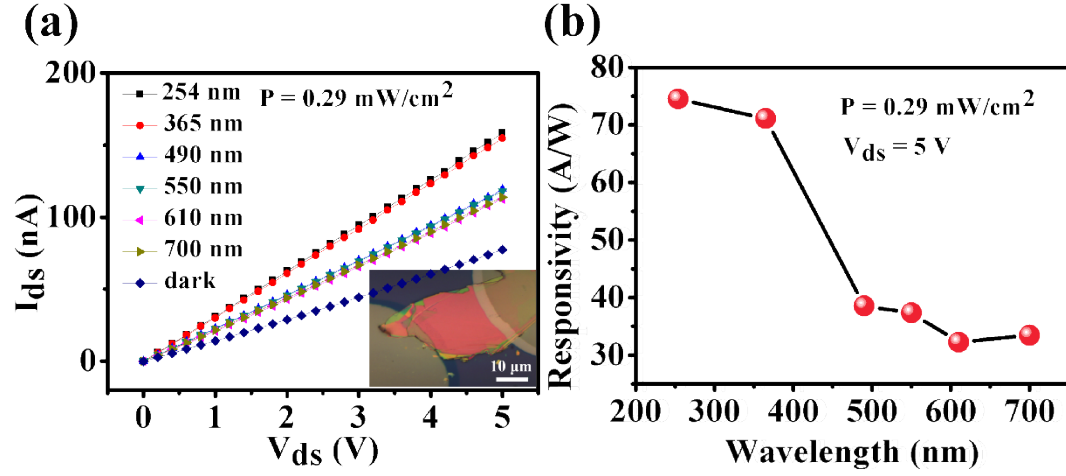

Figure S6. Optoelectronic properties characterization of CuGaSe<sub>2</sub> films (> 100 nm) devices. (a)  $I_{ds}$ - $V_{ds}$  characteristics of photodetector under different illumination wavelengths for illumination intensity  $P = 0.29 \text{ mW}\cdot\text{cm}^{-2}$ ; Inset is the optical image of CuGaSe<sub>2</sub> films devices. (b) Responsivity under different illumination wavelengths at bias voltage of 5 V.
